# Supplementary material
Source: PubMed Central journal article supplement (PMC6999366)
Supplement: ELSC-17-1118-s001.pdf [file ELSC-17-1118-s001.pdf]

**Supplementary Table 1** Primers used in this study

| Primer            | Sequence (5'-3') <sup>a</sup>                                                  | Paired with       | Intention                                |
|-------------------|--------------------------------------------------------------------------------|-------------------|------------------------------------------|
| SCFV-F            | <b>CCCAAGCTT</b> CTGGTTGAGACCAAAAAATTTTTTG<br><b>GTCTCAATGCAGATCCAGCTGGTGC</b> | SCFV<br>-R        | Amplifying scFv with two <i>Bsa</i> I    |
| OR-SCFV-F         | <b>CCCAAGCTT</b> CTGGTTGAGACCAAAAAATTTTTTG<br><b>GTCTCAATGCAAATTCAGCTGGTGC</b> | OR-<br>SCFV<br>-R | Amplifying OR-scFv with two <i>Bsa</i> I |
| POS-SCFV-F        | <b>CCAAGCTT</b> AAGGAGGACAACATAATGCAGATCC<br>AGCTGGTGC                         | SCFV<br>-R        | Amplifying scFv for pXMJ19-CSCFV         |
| SCFV-R            | <b>CCGGATCCTT</b> ACTTGATCTCCAGCTTAGTGC                                        |                   |                                          |
| POS-OR-<br>SCFV-F | <b>CCAAGCTT</b> AAGGAGGACAACATAATGCAAATTC<br>AGCTGGTGC                         | OR-<br>SCFV<br>-R | Amplifying OR-scFv for pXMJ19-COR-SCFV   |
| OR-SCFV-R         | <b>CCGGATCCTT</b> ATTTGATCTCCAGTTTGGTACC                                       |                   |                                          |
| T1-F              | <b>TTTGGTCTC</b> ATGGTTTAGGTAGCTTAAGTAGCCC<br>TG                               |                   |                                          |
| BT1-R             | <b>TTTGGTCTC</b> ACCATTAGTTGTCCTCCTTTGGACG<br>GATCGTGGAGATC                    | T1-F              | Amplifying T-BEP1                        |
| MT1-R             | <b>TTTGGTCTC</b> ACCATTGTCGTGTTCTTTCTGTTC                                      | T1-F              | Amplifying T-MEP1                        |
| T2-F              | <b>TTTGGTCTC</b> ATGGTTCTGAATTCATGACCCGCA                                      |                   |                                          |
| BT2-R             | <b>TTTGGTCTC</b> ACCATTAGTTGTCCTCCTTTGAAAG<br>GATGGACTTCTTCTGC                 | T2-F              | Amplifying T-BEP2                        |
| MT2-R             | <b>TTTGGTCTC</b> ACCATGGTGTCTCCTAAAAGTTATTT<br>CAG                             | T2-F              | Amplifying T-MEP2                        |
| T3-F              | <b>TTTGGTCTC</b> ATGGTTTTCAACAGCATTGATTTCCG<br>A                               |                   |                                          |
| BT3-R             | <b>TTTGGTCTC</b> ACCATTAGTTGTCCTCCTTTACGTGG<br>GGCTTGGTACG                     | T3-F              | Amplifying T-BEP3                        |
| MT3-R             | <b>TTTGGTCTC</b> ACCATTGTATGTCCTCCTGGACTTCG                                    | T3-F              | Amplifying T-MEP3                        |
| T4-F              | <b>TTTGGTCTC</b> ATGGTTCTGACATCGAAGTCACCAA<br>AG                               |                   |                                          |
| BT4-R             | <b>TTTGGTCTC</b> ACCATTAGTTGTCCTCCTTTAGCTCT<br>GCCAGAGCTGCT                    | T4-F              | Amplifying T-BEP4                        |
| MT4-R             | <b>TTTGGTCTC</b> ACCATTACTTCGCCTCCTTCCTCTTA<br>T                               | T4-F              | Amplifying T-MEP4                        |
| T5-F              | <b>TTTGGTCTC</b> ATGGTTCTGTCCTCCTCCTCCTCTAC                                    |                   |                                          |
| BT5-R             | <b>TTTGGTCTC</b> ACCATTAGTTGTCCTCCTTTCCGGTG<br>TGCCGCTC                        | T5-F              | Amplifying T-BEP5                        |
| MT5-R             | <b>TTTGGTCTC</b> ACCATTGGTGTACCTCCTGCTTG                                       | T5-F              | Amplifying T-MEP5                        |
| T6-F              | <b>TTTGGTCTC</b> ATGGTTGGGACACAGGGTGTCTT                                       |                   |                                          |
| BT6-R             | <b>TTTGGTCTC</b> ACCATTAGTTGTCCTCCTTTTGGTG<br>GTTCCAAGGTCAA                    | T6-F              | Amplifying T-BEP6                        |
| MT6-R             | <b>TTTGGTCTC</b> ACCATAATGGTGCCTCCTGTTTTAG                                     | T6-F              | Amplifying T-MEP6                        |

---

|        |                                                         |       |                    |
|--------|---------------------------------------------------------|-------|--------------------|
| T7-F   | TTTGGTCTCATGGTTAAATTCATAAACTTTTGCCG<br>TAA              |       |                    |
| BT7-R  | TTTGGTCTCACCATTAGTTGTCCTCCTTTCGGGTC<br>CGGGTTGG         | T7-F  | Amplifying T-BEP7  |
| MT7-R  | TTTGGTCTCACCATGTTTCGGTTTCCTTCGGC                        | T7-F  | Amplifying T-MEP7  |
| T8-F   | TTTGGTCTCATGGTACCAACCCAGGCCGC                           |       |                    |
| BT8-R  | TTTGGTCTCACCATTAGTTGTCCTCCTTTTTGTAC<br>TGCTTTCGCCG      | T8-F  | Amplifying T-BEP8  |
| MT8-R  | TTTGGTCTCACCATAGAGGGCTACCCCTTATCTG                      | T8-F  | Amplifying T-MEP8  |
| T9-F   | TTTGGTCTCATGGTAGTGTGTTAGTATTCGATGGG<br>TC               |       |                    |
| BT9-R  | TTTGGTCTCACCATTAGTTGTCCTCCTTTGAACG<br>GGTGTGCTCAGC      | T9-F  | Amplifying T-BEP9  |
| MT9-R  | TTTGGTCTCACCATGAGTAAATCTCCTGGATGAT<br>CG                | T9-F  | Amplifying T-MEP9  |
| T10-F  | TTTGGTCTCATGGTCCATTTGGGGCAATCCA                         |       |                    |
| BT10-R | TTTGGTCTCACCATTAGTTGTCCTCCTTTTAGATC<br>TCAGGCTCAATCGTG  | T10-F | Amplifying T-BEP10 |
| MT10-R | TTTGGTCTCACCATGTTTTACTCCTTTATTCGCAA<br>GT               | T10-F | Amplifying T-MEP10 |
| T11-F  | TTTGGTCTCATGGTGCATTGCATCTAACAAGGTC<br>G                 |       |                    |
| BT11-R | TTTGGTCTCACCATTAGTTGTCCTCCTTTTGGCCA<br>TCCTGCTCACC      | T11-F | Amplifying T-BEP11 |
| MT11-R | TTTGGTCTCACCATACTTGTTCCTGCTGCTCA                        | T11-F | Amplifying T-MEP11 |
| T12-F  | TTTGGTCTCATGGTCGGGCGCCTAGAGGG                           |       |                    |
| BT12-R | TTTGGTCTCACCATTAGTTGTCCTCCTTTTCGCGC<br>AGTGCGC          | T12-F | Amplifying T-BEP12 |
| MT12-R | TTTGGTCTCACCATGATGTCCTCCCGGTGGTT                        | T12-F | Amplifying T-MEP12 |
| HP1-F  | TTTGGTCTCATGGT<br>ACGGTGAACATGCAGTAAATG                 |       |                    |
| BHP1-R | TTTGGTCTCACCATTAGTTGTCCTCCTTT<br>TTTCAGAGTTGAACCATTTACT | HP1-F | Amplifying HP-BEP1 |
| MHP1-R | TTTGGTCTCACCAT<br>GAAATTCCTCCTAAAGCGATC                 | HP1-F | Amplifying HP-MEP1 |
| HP2-F  | TTTGGTCTCATGGT<br>CGATTCAAATAGGTGCTGATATT               |       |                    |
| BHP2-R | TTTGGTCTCACCATTAGTTGTCCTCCTTT<br>AGTGTGTTAAGCGCTGCAAT   | HP2-F | Amplifying HP-BEP2 |
| MHP2-R | TTTGGTCTCACCAT<br>TGTTTTGTTCCTCCCTGAATATG               | HP2-F | Amplifying HP-MEP2 |
| HP3-F  | TTTGGTCTCATGGT<br>GAAATCGTAAAAGTTGATGCAG                |       |                    |

---

|         |                                                            |        |                     |
|---------|------------------------------------------------------------|--------|---------------------|
| BHP3-R  | TTTGGTCTCACCATTAGTTGTCCTCCTTT<br>GTAGAACCGTTTTGGTTGTATAATG | HP3-F  | Amplifying HP-BEP3  |
| MHP3-R  | TTTGGTCTCACCAT<br>AATCAATTCCTCCTTTCCTAAG                   | HP3-F  | Amplifying HP-MEP3  |
| HP4-F   | TTTGGTCTCATGGT<br>TACCACCATGTCGTATAACCC                    |        |                     |
| BHP4-R  | TTTGGTCTCACCATTAGTTGTCCTCCTTT<br>ATGAATAATGAAGATACGAATGAAG | HP4-F  | Amplifying HP-BEP4  |
| MHP4-R  | TTTGGTCTCACCAT<br>GACATTTCCCCTAATTGATTG                    | HP4-F  | Amplifying HP-MEP4  |
| HP5-F   | TTTGGTCTCATGGT TTTTCGGACCGTAGTGCA                          |        |                     |
| BHP5-R  | TTTGGTCTCACCATTAGTTGTCCTCCTTT<br>GCAATACGGACTGTTCTTGC      | HP5-F  | Amplifying HP-BEP5  |
| MHP5-R  | TTTGGTCTCACCAT<br>TTAAAAGCCTCCTCTCTTAGCG                   | HP5-F  | Amplifying HP-MEP5  |
| HP6-F   | TTTGGTCTCATGGT<br>GGGAAAGAATATGTGGTCCAA                    |        |                     |
| BHP6-R  | TTTGGTCTCACCATTAGTTGTCCTCCTTT<br>TTTGGGCGGATAATGTACAT      | HP6-F  | Amplifying HP-BEP6  |
| MHP6-R  | TTTGGTCTCACCAT CTGTTTGACCTCCTTTTGG                         | HP6-F  | Amplifying HP-MEP6  |
| HP7-F   | TTTGGTCTCATGGT<br>AAAGGGTTTAAGCTACCTTTTATG                 |        |                     |
| BHP7-R  | TTTGGTCTCACCATTAGTTGTCCTCCTTT<br>TTTGCTCCCATACGTTTTAAAC    | HP7-F  | Amplifying HP-BEP7  |
| MHP7-R  | TTTGGTCTCACCAT<br>TTTACTAGCACCTCCGAAAATAT                  | HP7-F  | Amplifying HP-MEP7  |
| HP8-F   | TTTGGTCTCATGGT<br>GAAAAGGATCAAGGAATAGGATG                  |        |                     |
| BHP8-R  | TTTGGTCTCACCATTAGTTGTCCTCCTTT<br>GCTTCTGCAACCGCATTG        | HP8-F  | Amplifying HP-BEP8  |
| MHP8-R  | TTTGGTCTCACCAT GCCTTTCACCTCCTCCCA                          | HP8-F  | Amplifying HP-MEP8  |
| HP9-F   | TTTGGTCTCATGGT<br>TACGAAGAAGTGCCGAAGAG                     |        |                     |
| BHP9-R  | TTTGGTCTCACCATTAGTTGTCCTCCTTT<br>GCATGTGATTGGAACGGTC       | HP9-F  | Amplifying HP-BEP9  |
| MHP9-R  | TTTGGTCTCACCAT<br>TCTAAAATCCTCCTTAAGAGCTTT                 | HP9-F  | Amplifying HP-MEP9  |
| HP10-F  | TTTGGTCTCATGGT<br>AGGTTCTAACACACCGATCAAC                   |        |                     |
| BHP10-R | TTTGGTCTCACCATTAGTTGTCCTCCTTT<br>CGTGAACCTTCTGAAGGTTTTA    | HP10-F | Amplifying HP-BEP10 |
| MHP10-R | TTTGGTCTCACCAT<br>TAGGACACCTCCTTATCCGATC                   | HP10-F | Amplifying HP-MEP10 |

|         |                                                                    |        |                     |
|---------|--------------------------------------------------------------------|--------|---------------------|
| HP11-F  | <b>TTTGGTCTC</b> ATGGT<br>CAATCTGCAGAGAAGATTGTTG                   |        |                     |
| BHP11-R | <b>TTTGGTCTC</b> ACCATTAGTTGTCCTCCTTT<br>GTCATACCAATTTTTCTTCTAAGAT | HP11-F | Amplifying HP-BEP11 |
| MHP11-R | <b>TTTGGTCTC</b> ACCAT<br>TCGTCACACCTCCTATTAAGATC                  | HP11-F | Amplifying HP-MEP11 |
| HP12-F  | <b>TTTGGTCTC</b> ATGGT<br>AAGAGGTATATGGAGCCGCTATA                  |        |                     |
| BHP12-R | <b>TTTGGTCTC</b> ACCATTAGTTGTCCTCCTTT<br>TTGATGAGTTGGTTTTACGCTC    | HP12-F | Amplifying HP-BEP12 |
| MHP12-R | <b>TTTGGTCTC</b> ACCAT<br>CCTGTTTCACCTCCAAATCATAT                  | HP12-F | Amplifying HP-MEP12 |

<sup>a</sup> The sites for the restriction enzymes are in boldface

### Supplementary Table 2 Information about gene resources

#### *C. glutamicum* transcriptomic data (T-Set)

| Source gene name | GeneID   | Promoter predicted score <sup>a</sup> | Original relative Abundance <sup>b</sup> | Number (n) |
|------------------|----------|---------------------------------------|------------------------------------------|------------|
| rpsO             | NCg11901 | 1, 0.86, 0.83                         | 145501.21                                | 1          |
| NCg12252         | NCg12252 | 0.96                                  | 103193.55                                | 2          |
| tuf              | NCg10480 | 1                                     | 82146.61                                 | 3          |
| rplJ             | NCg10468 | 0.98, 0.84                            | 54100.16                                 | 4          |
| NCg11504         | NCg11504 | 0.82, 0.97, 0.92, 0.81                | 48226.93                                 | 5          |
| dnaK             | NCg12702 | 0.87, 0.93                            | 41129.44                                 | 6          |
| NCg12177         | NCg12177 | 0.93, 0.97                            | 37574.99                                 | 7          |
| rplU             | NCg12280 | 0.89                                  | 37186.55                                 | 8          |
| tig              | NCg12329 | 0.87                                  | 36838.62                                 | 9          |
| NCg11941         | NCg11941 | 0.96, 0.99                            | 30018.77                                 | 10         |
| NCg10576         | NCg10576 | 0.85, 0.98                            | 26576.12                                 | 11         |
| NCg12088         | NCg12088 | 0.88, 0.98                            | 26092.99                                 | 12         |

<sup>a</sup> the promoter prediction score threshold was set to 0.8 as default in program. Previously reported tests showed that above this threshold, the rate of false predictions was lower than 0.2%. (Reese MG, Application of a time-delay neural network to promoter annotation in the *Drosophila melanogaster* genome. *Comput Chem.* 2001, 26,51-56). Due to the possibility of tandem promoters, a prediction may found several possible promoters.

<sup>b</sup> Transcriptional performance (average FPKM of two sets of data obtained from two conditions with 30% or 50% dissolved oxygen levels in transcriptomic analysis (GEO accession number: GSE77502))

#### *B. subtilis* proteomic data (HP-Set)

| Source gene name | GeneID   | Promoter predicted score <sup>a</sup> | Original relative Abundance <sup>b</sup> | Number (n) |
|------------------|----------|---------------------------------------|------------------------------------------|------------|
| cspB             | BSU09100 | 0.99, 0.96                            | 27185                                    | 1          |
| flagellin        | BSU35360 | 0.90, 0.93, 0.99                      | 18102                                    | 2          |
| rplD             | BSU01170 | 0.96                                  | 14481                                    | 3          |

|      |          |                        |       |    |
|------|----------|------------------------|-------|----|
| yweA | BSU37800 | 0.99, 0.91             | 12297 | 4  |
| rplV | BSU01210 | 0.92, 0.81, 0.89       | 11979 | 5  |
| rpsF | BSU40910 | 0.98, 0.95             | 11325 | 6  |
| rpsP | BSU15990 | 0.96, 0.98             | 9646  | 7  |
| hbs  | BSU22790 | 0.91, 0.96, 0.85, 0.96 | 9070  | 8  |
| tuf  | BSU01130 | 0.98, 0.87             | 8788  | 9  |
| rplO | BSU01350 | 0.95, 0.97, 0.97, 0.96 | 8097  | 10 |
| rplC | BSU01160 | 0.86, 0.99, 0.88, 0.95 | 7636  | 11 |
| rpsO | BSU16680 | 0.96, 0.92, 0.99, 0.96 | 7461  | 12 |

<sup>a</sup> As described in the prior table in Table 2.

<sup>b</sup> According to the data provided by PaxDb: Protein Abundance Database (<http://pax-db.org/about>).

### Supplementary Sequence 1

Original scFv (OR-scFv)

Heavy chain (FR1-CDR1-FR2-CDR2-FR3-CDR3-FR4)-linker-light-chain (FR1-CDR1-FR2-CDR2-FR3-CDR3-FR4)

```

ATGCAGATCCAGTTGGTGCAGTCTGGACCTGAGCTGAAGAAGCCTGGAGAGACAGTCAAGATCTCCT
GCAAGGCTTCTGGGTATACCTTCACATATTATGGAATGAACTGGGTGAAGCAGGCTCCAGGAAAGGG
TTTAAAGTGGATGGGCTGGATAAACACCTACACTGGAGAGCCAACATATGCTGATGACTTCAAGGGA
CGGTTTGCCTTCTCTTTGGAAACCTCTGCCAGCACTGCCTATTTGCAGATCAGCAACCTCAAAAATGA
GGACACGGCTACATATTTCTGTTCAGTCAAAATTACTACGGTAATAATAACAGATACTTCGATGTCT
GGGGCGCAGGGACCACGGTCACCGTCTCCTCAGGCGGTGGTAGTGGTGGTAGTGGCGGCGGTA
GCCAAATGTCTCTCCAGTCTCCAGCAATCCTGTCTGCATCTCCAGGGGAGAAGGTCACAATGACT
TGTAGGGCCAGCTCAAGTGTAATTACATGCACCTGGTACCAGCAGAAGCCAGGATCTCCCCAAAC
CCTGGATTTATGCCACATCCATCCTGGCTTCTGGAGTCCCTGCTCGCTTCAGTGGCAGTGGGTCTGGG
ACCTCTTACTCTCTACAATCAGCAGAGTGGAGGCTGAAGATGCTGCCACTTATTAAGTGCAGCAGTG
GTATAGTAACCCACGGACGTTTCGGTGGAGGCACCAAGCTGGAAATCAAATAA

```

Codon-optimized scFv

```

ATGCAGATCCAGCTGGTGCAGTCTGGCCAGAAGCTGAAGAAGCCAGGCGAAACCGTGAAAATCTCCT
GCAAGGCCTCCGGCTATACCTTTACCTACTACGGTATGAAGTGGGTCAAGCAGGCCCCAGGCAAGGGC
CTCAAGTGGATGGGCTGGATCAACACCTACACCGGCGAGCCAACCTACGCAGACGATTTCAAGGGCC
GCTTCGCCTTCTCCCTGGAAACCTCCGCATCCACCGCATACCTGCAGATCTCCAACCTCAAGAATGAG
GACACCGCCACCTACTTCTGCTCCTCCAGAAGTACTACGGCAACAACAACCGCTACTTTCGACGCTGTG
GGGCGCAGGCACTACCGTGACCGTCTCCTCCGGTGGTGGTTCCGGTGGTGGTTCCGGTGGCGGCTCCC
AGATCGTGTGTGCCAGTCCCCTGCAATCCTGTCCGCATCCCAGGCGAGAAGGTCACCATGACCTGC
CGCGCTCCTCCTCCGTCAACTACATGCACCTGGTACCAGCAGAAGCCAGGCTCCTCCCCAAAGCCATG
GATCTACGCCACCTCCATCCTGGCATCCGGCGTGCCAGCCCGTTTTTTCCGGTCCGGTTCCGGCACCTC
TTACTCCCTGACCATCTCCCGGTCGAAGCAGAGGACGCAGCAACCTACTACTGCCAGCAGTGGTACT
CCAACCCACGCACCTTCGGCGGGCGGCACTAAGCTGGAGATCAAGTAA

```

### Supplementary Sequence 2

The sequence of HP-BEP4 which can be directly connected to target gene to control its expression in *C. glutamicum*

TACCACCATGTCGTATAACCCGGATCAGCCTGATGAAAAAGAATTCCGTGGGATGATGAG**GACGATCG**  
**GTTTTAACTGGAACACTGAATTCAGATAAAAAATAGGAACGTGATCAATCGAAGAGCAGAGGCATCTTC**  
GACTTTTTTTGCCCTTTTTTAAAATAGGATAAAAGATATAAAATGTCAGGCAGATGTTACTAGAAAAAG  
AGAGGAAATCGTCCATTTGAACCTTGTATAAACAGGAAGGAATTCTCATTGAATTCCAAGTGTTAATA  
TTCCTAAAAAACATTTACTTCCATGGAAAATGATGATAG**ATTAATTTTTAAGAAAAAGAACTGGTAATT**  
**CGCGAATTATGAAAAAGCGC**TTTTTCTGCAGAGGACGCTCTGGCCAAATTTCAACA**ATCAATTAGGGG**  
**GAAATGTCATGCTAAAAAGAACTTCATTCGTATCTTCATTATTCATAAAGGAGGACA****ACTA**

Underlined sequence: the 38-bp N-terminal sequences of yweA gene in *B. subtilis*.

Bold sequence: the imbedded SD2 sequence.
